# Supplementary figures and images for: The Role of the Therapeutic Relationship in Psychopharmacological Treatment Outcomes: A Meta-analytic Review
Source: Atypon-hosted journal article supplement (doi:10.1176/appi.ps.201700114), 2017-09-25

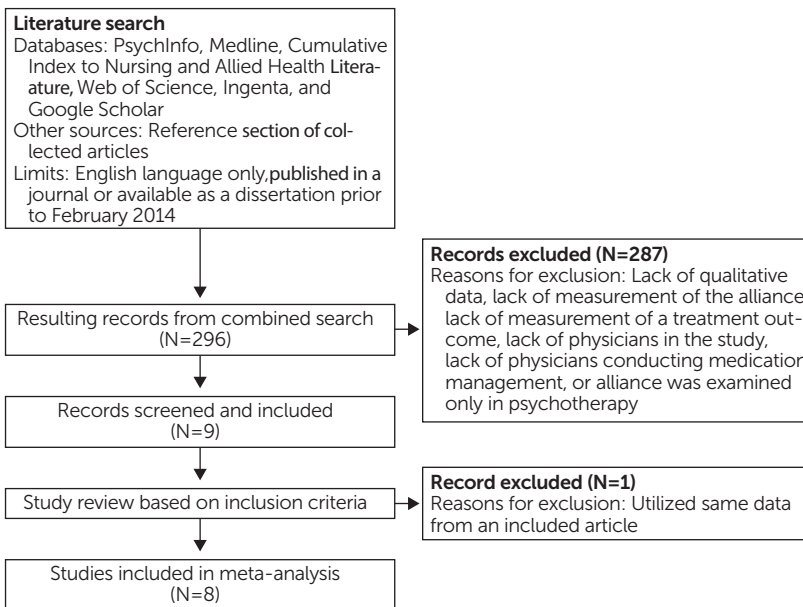

Supplement: appi.ps.201700114.ds001.pdf [file appi.ps.201700114.ds001.pdf]
